# Supplementary material
Source: HighWire-hosted journal article supplement (https://www.jrheum.org/highwire/filestream/38466/field_highwire_adjunct_files/0/200646DataSuppl.pdf)
Supplement: 200646DataSuppl.pdf [file 200646DataSuppl.pdf]

ONLINE SUPPLEMENTARY MATERIAL

**Supplementary Data 1.**

**Survey: The impact of COVID-19 on the well-being of rheumatology patients**

**Content of text message:**

First and second text message: Dear patient, NUH Rheumatology requests to know how COVID19 has affected you. Please answer this survey.

<https://aio.nuhs.edu.sg/redcap/surveys/?s=69p9Gdy>

Third text message: Dear patient, this is a final reminder for the NUH Rheumatology COVID19 survey. We do hope to hear from you.

<https://aio.nuhs.edu.sg/redcap/surveys/?s=69p9Gdy>

1. Are you currently working?
  - a. Yes, full time work
  - b. Yes, part time work
  - c. I am not currently working
2. If you are working, how has the COVID19 outbreak affected your work?
  - a. I stopped work
  - b. I was working from home
  - c. I continued to work as usual
  - d. I had to take time off work more than usual
  - e. Others \_\_\_\_\_
3. Where do you get your information about COVID19? (tick all that apply)
  - a. MOH website or WhatsApp channel
  - b. TV
  - c. Newspaper
  - d. Radio
  - e. Friends and family
  - f. Social media (e.g. WhatsApp/Facebook/Instagram/Twitter)
4. Have you contacted health care professionals for advice about COVID19? Yes or No
  - a. Were you reassured by the advice given?
5. Have you travelled abroad from 1<sup>st</sup> December 2019 till now? Yes or no
  - a. If yes – which countries (please list all)?
6. Have you cancelled your travel plans since 1<sup>st</sup> December 2019?
7. Have you been worried about going out because of the COVID 19 virus? (0-10 scale)
8. Have you been wearing a face mask even though you are well? Yes or no
9. Have you been washing or sanitising your hands more often in the last 3 months? (yes or no)
  - a. If yes, are you aware of the 6 steps in hand washing?
10. Have you participated in social activities (gatherings, sports, hobbies, etc.) since 1<sup>st</sup> December 2019?
  - a. Just the same as before COVID19
  - b. Less than before COVID19
  - c. More than before COVID19
11. How many days were you off on Medical Certificate (MC) from a doctor in the past 3 months? \_\_\_\_\_ days
12. In the past 3 months, did you see a doctor more than usual? Yes or No

13. Are you up to date with your flu and pneumonia vaccinations? Yes or no or not sure
14. How worried are you about catching the COVID-19 virus? (scale 0-10)
15. Have **you** been tested for the COVID19 virus? Yes or No
  - a. Was it positive? Yes or No
16. Has **anyone you are living with** been tested for the COVID-19 virus? Yes or No
  - a. Was it positive? Yes or No
17. Prior to the COVID-19 outbreak, have you been taking your medication regularly?  
Yes or No.
18. Do you think your rheumatic condition will increase your risk for COVID-19? Yes or No
19. Do you think your medication will increase your risk for COVID-19? Yes or No
20. Do you think your medication will protect you from the COVID19? Yes or no
21. In the past 3 months since the COVID-19 outbreak, how regular have you been with your medication?
  - a. More regular than before COVID-19
  - b. Just the same as before COVID-19
  - c. Less regular compared to before COVID-19
22. If your medication intake is less regular, why did you take it less regularly?
  - a. The rheumatologist told me to.
  - b. Other doctors told me to.
  - c. The pharmacist told me to.
  - d. I was having side effects.
  - e. I have/ had an infection.
  - f. I (or people around me) was worried about COVID-19.
23. Have you considered stopping your rheumatic medications because you were worried about COVID-19? (scale 0-10)
24. Are there any other changes in your behaviour that you have made because of COVID-19? (few text boxes)

*It is important that we try to understand as much as we can on the impact of COVID-19 on our rheumatology patients. Would you be agreeable to be contacted for further research on this? This may include giving a small sample of blood so that researchers can investigate the immune system of patients with rheumatic diseases.*

Tick this box if you agree

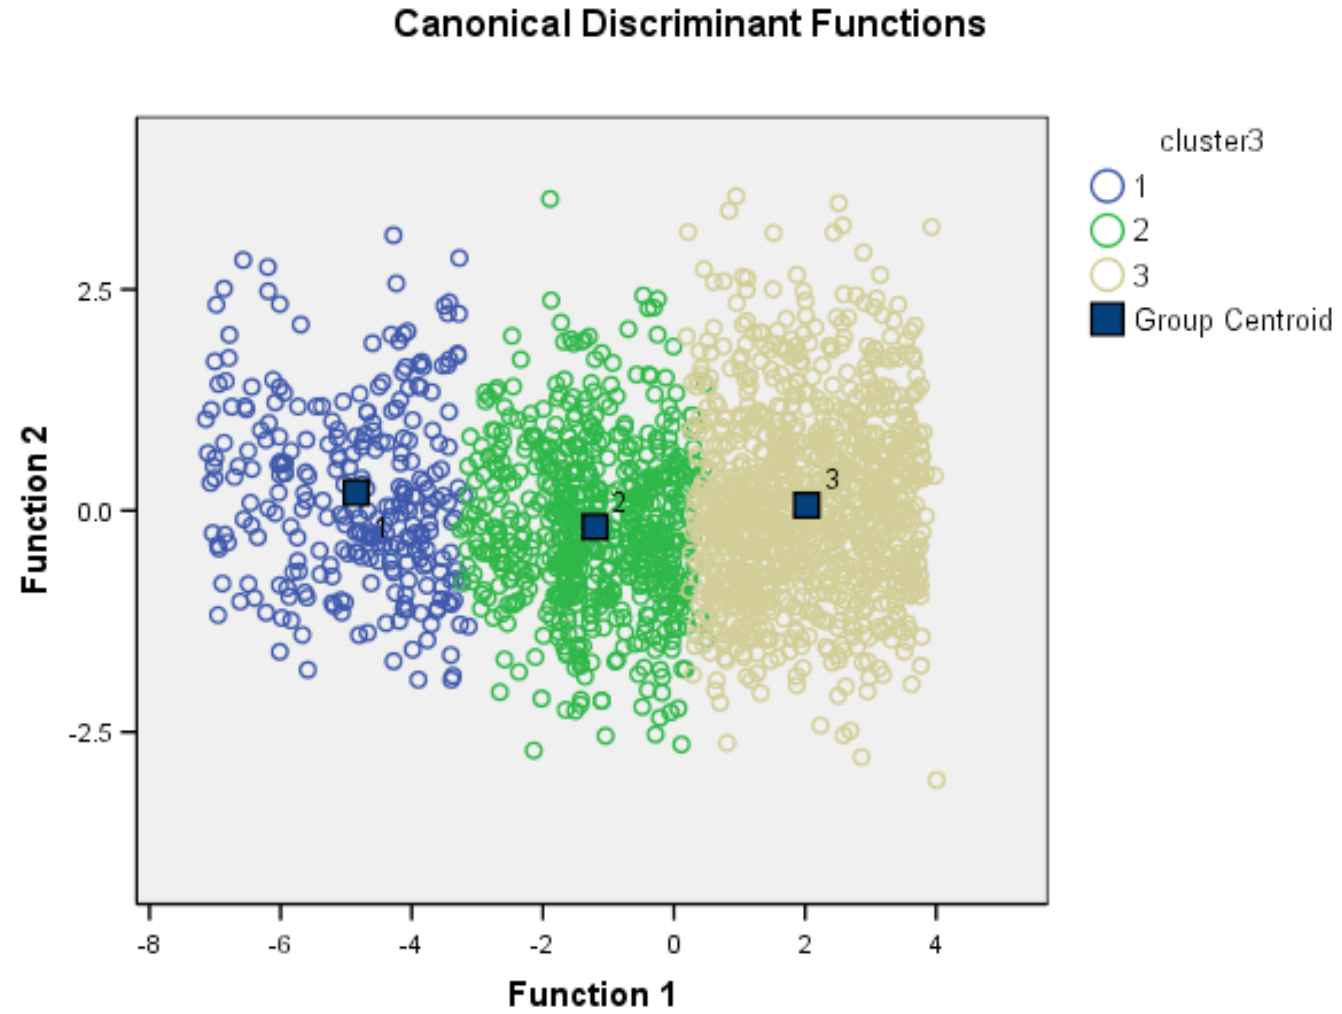

**Supplementary Figure 1.** Canonical discriminant analysis of the 3 clusters as well as their group centroids. The plot shows the clear discrimination of the 3 clusters based on the discrimination functions 1 and 2. 3
